# Supplementary material
Source: PubMed Central journal article supplement (PMC2727071)
Supplement: NIHMS124158-supplement-b106Song_cor_pdf.pdf [file NIHMS124158-supplement-b106Song_cor_pdf.pdf]

1 Electrostatic Environment of Hemes in Proteins:  $pK_a$ s of  
2 Hydroxyl Ligands, by Yifan Song, Junjun Mao, and  
3 M. R. Gunner\*, Volume 45, Number 26, July 4, 2006,  
4 pages 7949–7958.

5 Calculated Proton Uptake on Anaerobic Reduction of  
6 Cytochrome *c* Oxidase: Is the Reaction Electroneutral? by  
7 Yifan Song, Ekaterina Michonova-Alexova, and M. R.  
8 Gunner, Volume 45, Number 26, July 4, 2006, pages 7959–  
9 7975.

10 We acknowledge RCMI-NIH Grant RR03060 which  
11 provided infrastructure support for this work.

12 BI068023Z
